# Supplementary material for: ABCE1 Regulates RNase L-Induced Autophagy during Viral Infections
Source: Viruses. 2021 Feb 18;13(2):315. doi: 10.3390/v13020315 (PMC7922175; doi:10.3390/v13020315)
Supplement: Supplementary file 1 [file viruses-13-00315-s001.zip › viruses-1102581-supplementary.pdf]

**A**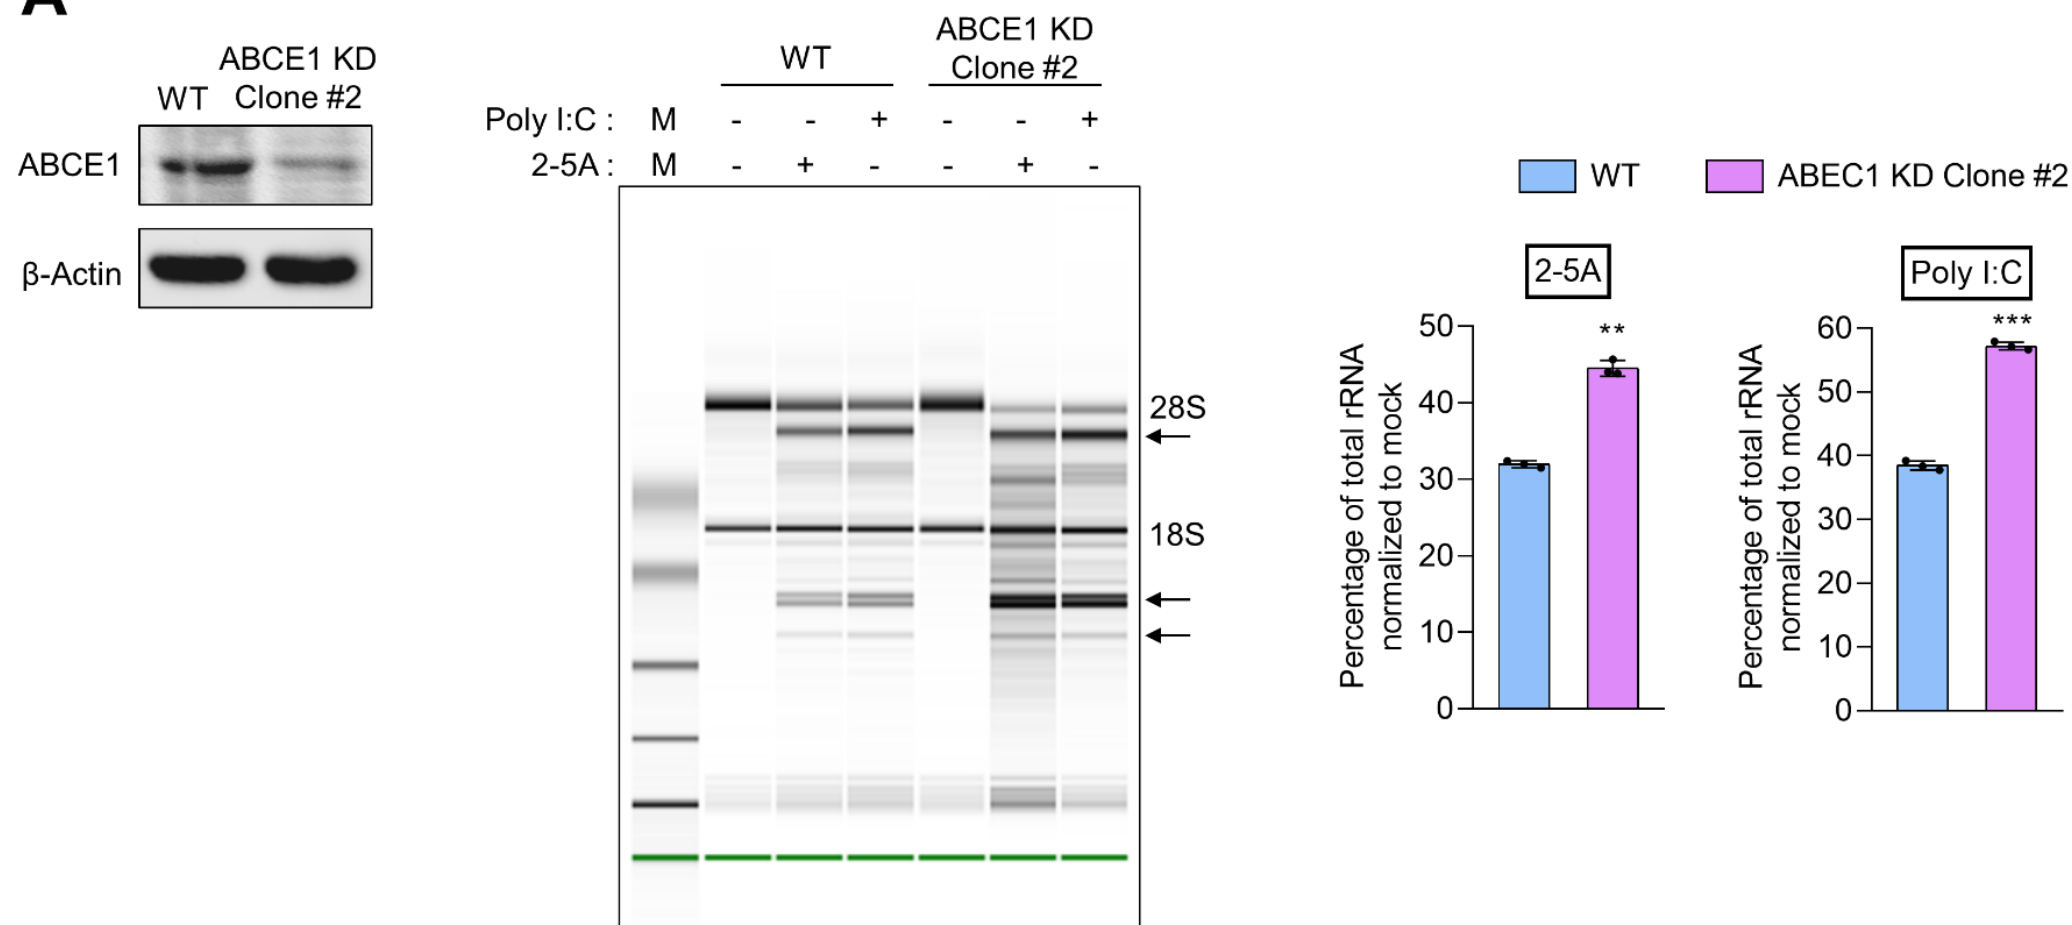**B**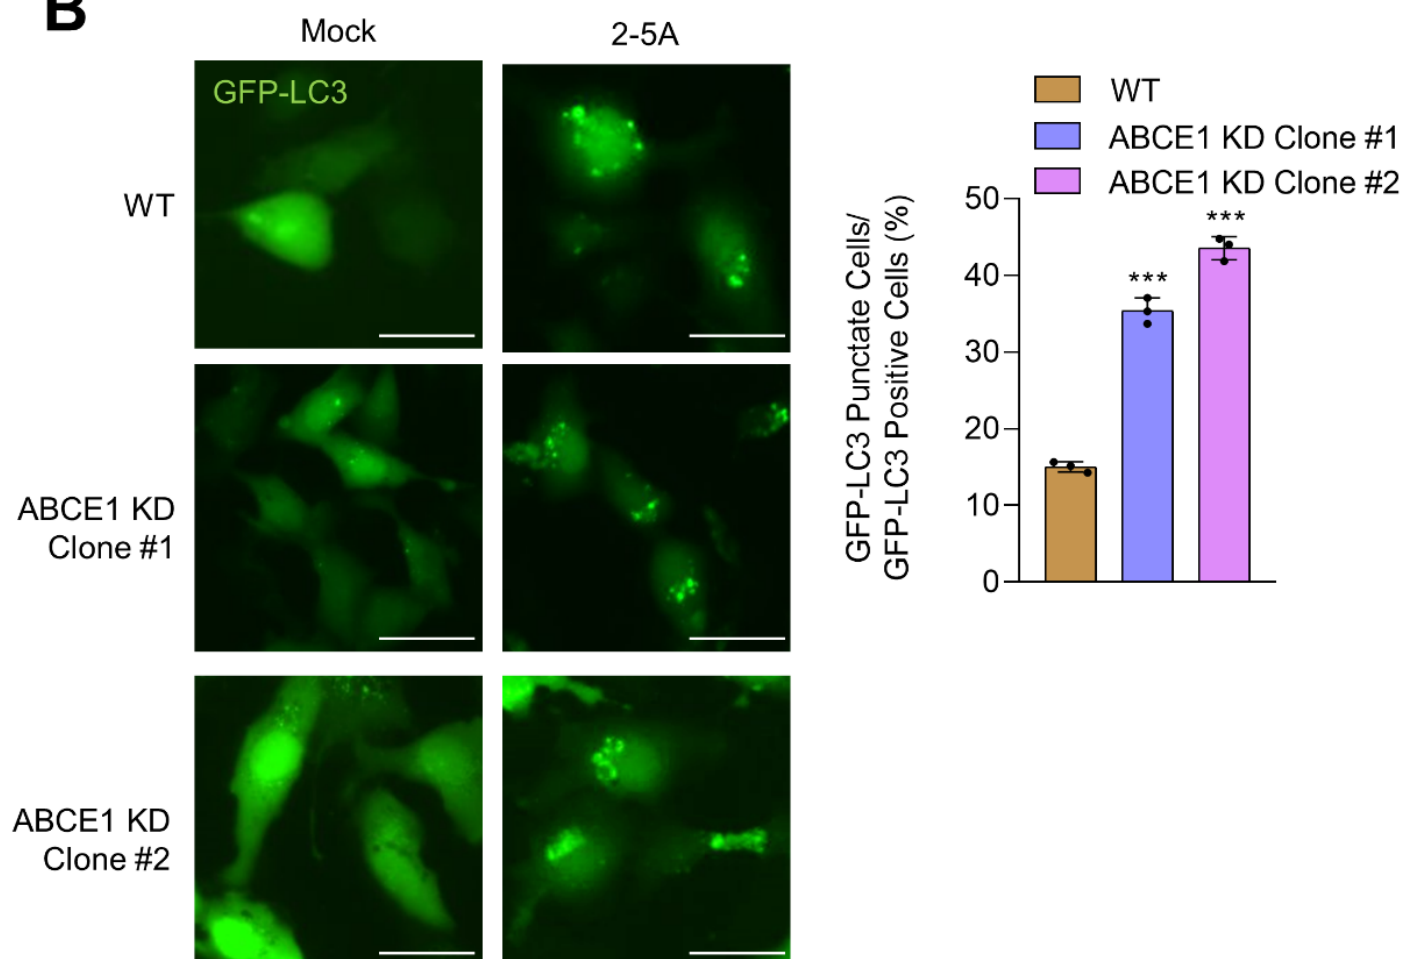**C**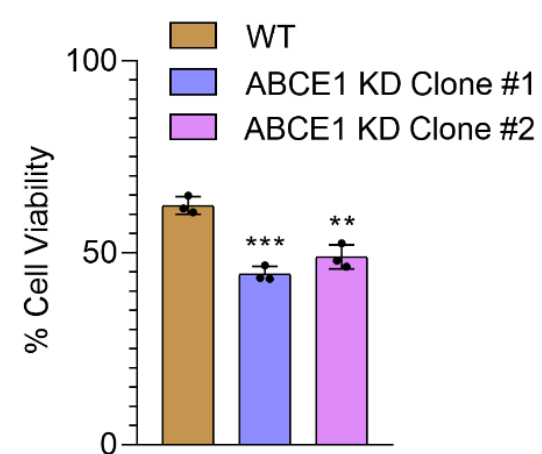**D**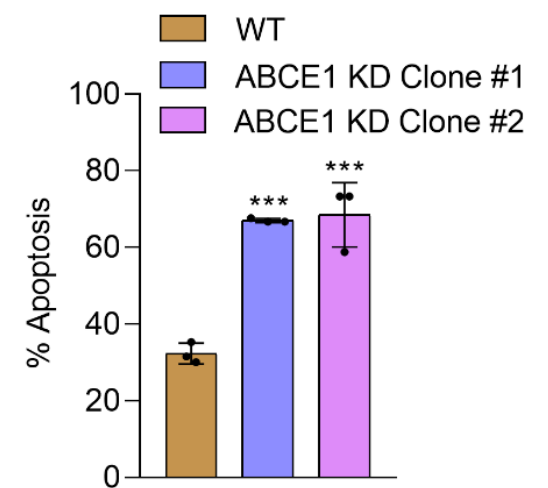

**Figure S1.** (A) Knockdown of ABCE1 levels in clone 2 using shRNA in HT1080 WT cells was verified in cell lysates by immunoblotting using specific antibodies. WT and ABCE1 KD clone 2 cells were transfected with 2–5A (10  $\mu$ M) or 2  $\mu$ g/mL of Poly I:C for 6 h and RNase L-mediated cleavage of rRNA (arrows) was analyzed on RNA chips using the Agilent Bioanalyzer 2100. Cleavage of rRNA was quantitated and normalized to mock treated samples. (B) HT1080 WT and ABCE1 KD clone 1 and clone 2 cells expressing GFP-LC3 were mock transfected or transfected with 2–5A (10  $\mu$ M) and the formation of GFP-LC3 puncta was microscopically imaged and the percentage of GFP+ cells showing puncta formation compared with mock-treated cells was analyzed. Scale bar 50  $\mu$ m. HT1080 WT and ABCE1 KD clone 1 and clone 2 cells were transfected with 10 $\mu$ M of 2–5A for indicated times and (C) Cell Viability was measured using MTT reagent, (D) Percent apoptotic cells was determined by Trypan blue dye exclusion assay. Experiments performed in triplicate and shown as mean  $\pm$  SD and compared to WT cells. WT: wild-type; \*\*,  $p < 0.01$ ; \*\*\*,  $p < 0.001$ .
